# Supplementary material
Source: ML conference proceedings conference paper supplement (https://proceedings.mlr.press/v139/liu21h.html)
Supplement: Supplementary file [file liu21h-supp.pdf]

# Appendix

Jiashuo Liu<sup>1</sup> Zheyuan Hu<sup>1</sup> Peng Cui<sup>1</sup> Bo Li<sup>2</sup> Zheyuan Shen<sup>1</sup>

## A. Additional Simulation Results and Details

**Selection Bias** In this setting, the correlations among covariates are perturbed through selection bias mechanism. According to assumption 2.1, we assume  $X = [\Phi^*, \Psi^*]^T \in \mathbb{R}^d$  and  $\Phi^* = [\Phi_1^*, \Phi_2^*, \dots, \Phi_{n_\phi}^*]^T \in \mathbb{R}^{n_\phi}$  is independent from  $\Psi^* = [\Psi_1^*, \Psi_2^*, \dots, \Psi_{n_\psi}^*] \in \mathbb{R}^{n_\psi}$  while the covariates in  $\Phi^*$  are dependent with each other. We assume  $Y = f(\Phi^*) + \epsilon$  and  $P(Y|\Phi^*)$  remains invariant across environments while  $P(Y|\Psi^*)$  can arbitrarily change.

Therefore, we generate training data points with the help of auxiliary variables  $Z \in \mathbb{R}^{n_\phi+1}$  as following:

$$Z_1, \dots, Z_{n_\phi+1} \stackrel{iid}{\sim} \mathcal{N}(0, 1.0) \quad (1)$$

$$\Psi_1^*, \dots, \Psi_{n_\psi}^* \stackrel{iid}{\sim} \mathcal{N}(0, 1.0) \quad (2)$$

$$\Phi_i^* = 0.8 * Z_i + 0.2 * Z_{i+1} \quad for \ i = 1, \dots, n_\phi \quad (3)$$

To induce model misspecification, we generate  $Y$  as:

$$Y = f(\Phi^*) + \epsilon = \theta_\phi * (\Phi^*)^T + \beta * \Phi_1^* \Phi_2^* \Phi_3^* + \epsilon \quad (4)$$

where  $\theta_\phi = [\frac{1}{2}, -1, 1, -\frac{1}{2}, 1, -1, \dots] \in \mathbb{R}^{n_\phi}$ , and  $\epsilon \sim \mathcal{N}(0, 0.3)$ . As we assume that  $P(Y|\Phi^*)$  remains unchanged while  $P(Y|\Psi^*)$  can vary across environments, we design a data selection mechanism to induce this kind of distribution shifts. For simplicity, we select data points according to a certain variable set  $V_b \subset \Psi^*$ :

$$\hat{P} = \prod_{v_i \in V_b} |r|^{-5 * |f(\phi) - sign(r) * v_i|} \quad (5)$$

$$\mu \sim Uni(0, 1) \quad (6)$$

$$M(r; (x, y)) = \begin{cases} 1, & \mu \leq \hat{P} \\ \text{otherwise} & \end{cases} \quad (7)$$

<sup>1</sup>Department of Computer Science and Technology, Tsinghua University, Beijing, China; Email: {liujiashuo77, zyhu2001}@gmail.com, cuip@tsinghua.edu.cn, shenzy17@mails.tsinghua.edu.cn. <sup>2</sup>School of Economics and Management, Tsinghua University, Beijing, China; Email: libo@sem.tsinghua.edu.cn. Correspondence to: Peng Cui <cuip@tsinghua.edu.cn>.

where  $|r| > 1$  and  $V_b \in \mathbb{R}^{n_b}$ . Given a certain  $r$ , a data point  $(x, y)$  is selected if and only if  $M(r; (x, y)) = 1$  (i.e. if  $r > 0$ , a data point whose  $V_b$  is close to its  $Y$  is more probably to be selected.)

Intuitively,  $r$  eventually controls the strengths and direction of the spurious correlation between  $V_b$  and  $Y$  (i.e. if  $r > 0$ , a data point whose  $V_b$  is close to its  $Y$  is more probably to be selected.). The larger value of  $|r|$  means the stronger spurious correlation between  $V_b$  and  $Y$ , and  $r \geq 0$  means positive correlation and vice versa. Therefore, here we use  $r$  to define different environments.

In training, we generate *sum* data points, where  $\kappa \cdot \text{sum}$  points from environment  $e_1$  with a predefined  $r$  and  $(1 - \kappa) \cdot \text{sum}$  points from  $e_2$  with  $r = -1.1$ . In testing, we generate data points for 10 environments with  $r \in [-3, -2, -1.7, \dots, 1.7, 2, 3]$ .  $\beta$  is set to 1.0.

Apart from the two scenarios in main body, we also conduct scenario 3 and 4 with varying  $\kappa, n$  and  $n_b$  respectively.

**Anti-Causal Effect** Inspired by (Arjovsky et al., 2019), in this setting, we introduce the spurious correlation by using anti-causal relationship from the target  $Y$  to the variant covariates  $\Psi^*$ .

We assume  $X = [\Phi^*, \Psi^*]^T \in \mathbb{R}^d$  and  $\Phi^* = [\Phi_1^*, \Phi_2^*, \dots, \Phi_{n_\phi}^*]^T \in \mathbb{R}^{n_\phi}$ ,  $\Psi^* = [\Psi_1^*, \Psi_2^*, \dots, \Psi_{n_\psi}^*] \in \mathbb{R}^{n_\psi}$ . Data Generation process is as following:

$$\Phi^* \sim \sum_{i=1}^k z_i \mathcal{N}(\mu_i, I) \quad (8)$$

$$Y = \theta_\phi^T \Phi^* + \beta \Phi_1^* \Phi_2^* \Phi_3^* + \mathcal{N}(0, 0.3) \quad (9)$$

$$\Psi^* = \theta_\psi Y + \mathcal{N}(0, \sigma(\mu_i)^2) \quad (10)$$

where  $\sum_{i=1}^k z_i = 1$  &  $z_i \geq 0$  is the mixture weight of  $k$  Gaussian components,  $\sigma(\mu_i)$  means the Gaussian noise added to  $\Psi^*$  depends on which component the invariant covariates  $\Phi^*$  belong to and  $\theta_\psi \in \mathbb{R}^{n_\psi}$ . Intuitively, in different Gaussian components, the corresponding correlations between  $\Psi^*$  and  $Y$  are varying due to the different value of  $\sigma(\mu_i)$ . The larger the  $\sigma(\mu_i)$  is, the weaker correlation between  $\Psi^*$  and  $Y$ . We use the mixture weight  $Z = [z_1, \dots, z_k]^T$  to define different environments, where different mixture weights represent different overall strength of the effect  $Y$  on  $\Psi^*$ . In this experiment, we set  $\beta = 0.1$  and

Table 1. Results in selection bias simulation experiments of different methods with varying sample size  $sum$ , ratio  $\kappa$  and variant dimensions  $n_b$  of training data, and each result is averaged over ten times runs.

| Scenario 3: varying ratio $\kappa$ and sample size $sum$ ( $d = 10, r = 1.9, n_b = 1$ )               |                             |              |              |                             |              |              |                              |              |              |
|-------------------------------------------------------------------------------------------------------|-----------------------------|--------------|--------------|-----------------------------|--------------|--------------|------------------------------|--------------|--------------|
| $\kappa, n$                                                                                           | $\kappa = 0.90, sum = 1000$ |              |              | $\kappa = 0.95, sum = 2000$ |              |              | $\kappa = 0.975, sum = 4000$ |              |              |
| Methods                                                                                               | Mean_Error                  | Std_Error    | Max_Error    | Mean_Error                  | Std_Error    | Max_Error    | Mean_Error                   | Std_Error    | Max_Error    |
| ERM                                                                                                   | 0.477                       | 0.061        | 0.530        | 0.510                       | 0.108        | 0.608        | 0.547                        | 0.150        | 0.687        |
| DRO                                                                                                   | 0.480                       | 0.107        | 0.597        | 0.512                       | 0.111        | 0.625        | 0.608                        | 0.227        | 0.838        |
| EIIL                                                                                                  | 0.476                       | 0.063        | 0.529        | 0.507                       | 0.102        | 0.613        | 0.539                        | 0.148        | 0.689        |
| IRM(with $\mathcal{E}_{tr}$ label)                                                                    | 0.455                       | 0.015        | 0.471        | 0.456                       | 0.015        | 0.472        | 0.456                        | 0.015        | 0.472        |
| HRM                                                                                                   | <b>0.450</b>                | <b>0.010</b> | <b>0.461</b> | <b>0.447</b>                | <b>0.011</b> | <b>0.465</b> | <b>0.447</b>                 | <b>0.010</b> | <b>0.463</b> |
| Scenario 4: varying variant dimension $n_b$ ( $d = 10, sum = 2000, \kappa = 0.95, r = 1.9, n_b = 1$ ) |                             |              |              |                             |              |              |                              |              |              |
| $n_b$                                                                                                 | $n_b = 1$                   |              |              | $n_b = 3$                   |              |              | $n_b = 5$                    |              |              |
| Methods                                                                                               | Mean_Error                  | Std_Error    | Max_Error    | Mean_Error                  | Std_Error    | Max_Error    | Mean_Error                   | Std_Error    | Max_Error    |
| ERM                                                                                                   | 0.510                       | 0.108        | 0.608        | 0.468                       | 0.110        | 0.583        | 0.445                        | 0.112        | 0.567        |
| DRO                                                                                                   | 0.512                       | 0.111        | 0.625        | 0.515                       | 0.107        | 0.617        | 0.454                        | 0.122        | 0.577        |
| EIIL                                                                                                  | 0.520                       | 0.111        | 0.613        | 0.469                       | 0.111        | 0.581        | 0.454                        | 0.100        | 0.557        |
| IRM(with $\mathcal{E}_{tr}$ label)                                                                    | 0.456                       | 0.015        | 0.472        | 0.432                       | 0.014        | 0.446        | 0.414                        | 0.061        | 0.475        |
| HRM                                                                                                   | <b>0.447</b>                | <b>0.011</b> | <b>0.465</b> | <b>0.413</b>                | <b>0.012</b> | <b>0.431</b> | <b>0.402</b>                 | <b>0.057</b> | <b>0.462</b> |

build 10 environments with varying  $\sigma$  and the dimension of  $\Phi^*, \Psi^*$ , the first three for training and the last seven for testing. Specifically, we set  $\beta = 0.1, \mu_1 = [0, 0, 0, 1, 1]^T, \mu_2 = [0, 0, 0, 1, -1]^T, \mu_3 = [0, 0, 0, -1, 1]^T, \mu_4 = \mu_5 = \dots = \mu_{10} = [0, 0, 0, -1, -1]^T, \sigma(\mu_1) = 0.2, \sigma(\mu_2) = 0.5, \sigma(\mu_3) = 1.0$  and  $[\sigma(\mu_4), \sigma(\mu_5), \dots, \sigma(\mu_{10})] = [3.0, 5.0, \dots, 15.0]$ .  $\theta_\phi, \theta_\psi$  are randomly sampled from  $\mathcal{N}(1, I)$  and  $\mathcal{N}(0.5, 0.1I)$  respectively. We run experiments for 10 times and average the results.

## B. Proofs

### B.1. Proof of Theorem 2.1

First, we would like to prove that a random variable satisfying assumption 2.1 is MIP.

**Theorem B.1.** *A representation  $\Phi^* \in \mathcal{I}$  satisfying assumption 2.1 is the maximal invariant predictor.*

*Proof.*  $\rightarrow$ : To prove  $\Phi^* = \arg \min_{Z \in \mathcal{I}} I(Y; Z)$ . If  $\Phi^*$  is not the maximal invariant predictor, assume  $\Phi' = \arg \max_{Z \in \mathcal{I}} I(Y; Z)$ . Using functional representation lemma, consider  $(\Phi^*, \Phi')$ , there exists random variable  $\Phi_{extra}$  such that  $\Phi' = \sigma(\Phi^*, \Phi_{extra})$  and  $\Phi^* \perp \Phi_{extra}$ . Then  $I(Y; \Phi') = I(Y; \Phi^*, \Phi_{extra}) = I(f(\Phi^*); \Phi^*, \Phi_{extra}) = I(f(\Phi^*); \Phi^*)$ .

$\leftarrow$ : To prove the maximal invariant predictor  $\Phi^*$  satisfies the sufficiency property in assumption 2.1.

The converse-negative proposition is :

$$Y \neq f(\Phi^*) + \epsilon \rightarrow \Phi^* \neq \arg \max_{Z \in \mathcal{I}} I(Y; Z) \quad (11)$$

Suppose  $Y \neq f(\Phi^*) + \epsilon$  and  $\Phi^* = \arg \max_{Z \in \mathcal{I}} I(Y; Z)$ , and suppose  $Y = f(\Phi') + \epsilon$  where  $\Phi' \neq \Phi^*$ . Then we have:

$$I(f(\Phi'); \Phi^*) \leq I(f(\Phi'); \Phi') \quad (12)$$

Therefore,  $\Phi' = \arg \max_{Z \in \mathcal{I}} I(Y; Z)$   $\square$

Then we provide the proof of theorem 2.1.

**Theorem B.2.** *Let  $g$  be a strictly convex, differentiable function and let  $D$  be the corresponding Bregman Loss function. Let  $\Phi^*$  is the maximal invariant predictor with respect to  $\mathcal{I}_E$ , and put  $h^*(X) = \mathbb{E}_Y[Y|\Phi^*]$ . Under assumption 2.2, we have:*

$$h^* = \arg \min_h \sup_{e \in \text{supp}(\mathcal{E})} \mathbb{E}[D(h(X), Y)|e] \quad (13)$$

*Proof.* Firstly, according to theorem B.1,  $\Phi^*$  satisfies assumption 2.1. Consider any function  $h$ , we would like to prove that for each distribution  $P^e(e \in \mathcal{E})$ , there exists an environment  $e'$  such that:

$$\mathbb{E}[D(h(X), Y)|e'] \geq \mathbb{E}[D(h^*(X), Y)|e] \quad (14)$$

For each  $e \in \mathcal{E}$  with density  $([\Phi, \Psi], Y) \mapsto P(\Phi, \Psi, Y)$ , we construct environment  $e'$  with density  $Q(\Phi, \Psi, Y)$  that satisfies: (omit the superscript  $*$  of  $\Phi$  and  $\Psi$  for simplicity)

$$Q(\Phi, \Psi, Y) = P(\Phi, Y)Q(\Psi) \quad (15)$$

Note that such environment  $e'$  exists because of the heterogeneity property assumed in assumption 2.2. Then we

have:

$$\int D(h(\phi, \psi), y)q(\phi, \psi, y)d\phi d\psi dy \quad (16)$$

$$= \int_{\psi} \int_{\phi, y} D(h(\phi, \psi), y)p(\phi, y)q(\psi)d\phi dy d\psi \quad (17)$$

$$= \int_{\psi} \int_{\phi, y} D(h(\phi, \psi), y)p(\phi, y)d\phi dy q(\psi)d\psi \quad (18)$$

$$\geq \int_{\psi} \int_{\phi, y} D(h^*(\phi, \psi), y)p(\phi, y)d\phi dy q(\psi)d\psi \quad (19)$$

$$= \int_{\psi} \int_{\phi, y} D(h^*(\phi), y)p(\phi, y)d\phi dy q(\psi)d\psi \quad (20)$$

$$= \int_{\phi, y} D(h^*(\phi), yp(\phi, y)d\phi dy \quad (21)$$

$$= \int_{\phi, \psi, y} D(h^*(\phi), y)p(\phi, \psi, y)d\phi d\psi dy \quad (22)$$

$$(23)$$

□

## B.2. Proof of Theorem 2.2

**Theorem B.3.**  $\mathcal{I}_{\mathcal{E}} \subseteq \mathcal{I}_{\mathcal{E}_{tr}}$

*Proof.* Since  $\mathcal{E}_{tr} \subseteq \mathcal{E}$ , then for any  $S \in \mathcal{I}_{\mathcal{E}}$ ,  $S \in \mathcal{I}_{\mathcal{E}_{tr}}$ . □

## B.3. Proof of Theorem 2.3

**Theorem B.4.** Given set of environments  $\text{supp}(\hat{\mathcal{E}})$ , denote the corresponding invariance set  $\mathcal{I}_{\hat{\mathcal{E}}}$  and the corresponding maximal invariant predictor  $\hat{\Phi}$ . For one newly-added environment  $e_{new}$  with distribution  $P^{new}(X, Y)$ , if  $P^{new}(Y|\hat{\Phi}) = P^e(Y|\hat{\Phi})$  for  $e \in \text{supp}(\hat{\mathcal{E}})$ , the invariance set constrained by  $\text{supp}(\hat{\mathcal{E}}) \cup \{e_{new}\}$  is equal to  $\mathcal{I}_{\hat{\mathcal{E}}}$ .

*Proof.* Denote the invariance set with respect to  $\text{supp}(\hat{\mathcal{E}} \cup \{e_{new}\})$  as  $\mathcal{I}_{new}$ , it is easy to prove that  $\forall S \in \mathcal{I}_{\hat{\mathcal{E}}}$ , we have  $S \in \mathcal{I}_{new}$ , since the newly-added environment cannot exclude any variables from the original invariance set. □

## B.4. Proof of Theorem 4.1

**Theorem B.5.** Given  $\mathcal{E}_{tr}$ , the learned  $\Phi(X) = M \odot X$  is the maximal invariant predictor of  $\mathcal{I}_{\mathcal{E}_{tr}}$ .

*Proof.* The objective function for  $\mathcal{M}_p$  is

$$\mathcal{L}_p(M \odot X, Y; \theta) = \mathbb{E}_{\mathcal{E}_{tr}}[\mathcal{L}^e] + \lambda \text{trace}(\text{Var}_{\mathcal{E}_{tr}}(\nabla_{\theta} \mathcal{L}^e)) \quad (24)$$

Here we prove that the minimum of objective function can be achieved when  $\Phi(X) = M \odot X$  is the maximal invariant predictor. According to theorem B.1,  $\Phi(X)$  satisfies assumption 2.1, which indicates that  $P^e(Y|\Phi(X))$  stays invariant.

From the proof in C.2 in (Koyama & Yamaguchi, 2020),  $I(Y; \mathcal{E}|\Phi(X)) = 0$  indicates that  $\text{trace}(\text{Var}_{\mathcal{E}_{tr}}(\nabla_{\theta} \mathcal{L}^e)) = 0$ .

Further, from the sufficiency property, the minimum of  $\mathcal{L}^e$  is achieved with  $\Phi(X)$ . Therefore,  $\mathbb{E}_{\mathcal{E}_{tr}}[\mathcal{L}^e] + \lambda \text{trace}(\text{Var}_{\mathcal{E}_{tr}}(\nabla_{\theta} \mathcal{L}^e))$  reaches the minimum with  $\Phi(X)$  being the MIP. ( $\lambda \geq 0$ ) □

## B.5. Proof of Theorem 4.2

**Theorem B.6.** For  $e_i, e_j \in \text{supp}(\mathcal{E}_{tr})$ , assume that  $X = [\Phi^*, \Psi^*]^T$  satisfying Assumption 2.1, where  $\Phi^*$  is invariant and  $\Psi^*$  variant. Then under Assumption 4.1, we have  $D_{\text{KL}}(P^{e_i}(Y|X) \| P^{e_j}(Y|X)) \leq D_{\text{KL}}(P^{e_i}(Y|\Psi^*) \| P^{e_j}(Y|\Psi^*))$

*Proof.*

$$D_{\text{KL}}(P^{e_i}(Y|X) \| P^{e_j}(Y|X)) \quad (25)$$

$$= D_{\text{KL}}(P^{e_i}(Y|\Phi^*, \Psi^*) \| P^{e_j}(Y|\Phi^*, \Psi^*)) \quad (26)$$

$$= \int \int \int p_i(y, \phi, \psi) \log \left[ \frac{p_i(y|\phi, \psi)}{p_j(y|\phi, \psi)} \right] dy d\phi d\psi \quad (27)$$

Therefore, we have

$$D_{\text{KL}}(P^{e_i}(Y|\Psi) \| P^{e_j}(Y|\Psi)) - D_{\text{KL}}(P^{e_i}(Y|X) \| P^{e_j}(Y|X)) \quad (28)$$

$$= \int \int \int p_i(y, \phi, \psi) \left( \log \frac{p_i(y|\psi)}{p_j(y|\psi)} - \log \frac{p_i(y|\phi, \psi)}{p_j(y|\phi, \psi)} \right) dy d\phi d\psi \quad (29)$$

$$= \int \int \int p_i(y, \phi, \psi) \left( \log \frac{p_i(y|\psi)}{p_i(y|\phi, \psi)} - \log \frac{p_j(y|\psi)}{p_j(y|\phi, \psi)} \right) dy d\phi d\psi \quad (30)$$

$$= I_{i,j}^c(Y; \Phi^*|\Psi^*) - I_i(Y; \Phi^*|\Psi^*) \quad (31)$$

Therefore, we have

$$D_{\text{KL}}(P^{e_i}(Y|X) \| P^{e_j}(Y|X)) \leq D_{\text{KL}}(P^{e_i}(Y|\Psi^*) \| P^{e_j}(Y|\Psi^*)) \quad (32)$$

□

## B.6. Proof of Theorem 4.3

**Theorem B.7.** Under Assumption 2.1 and 2.2, for the proposed  $\mathcal{M}_c$  and  $\mathcal{M}_p$ , we have the following conclusions: 1. Given environments  $\mathcal{E}_{tr}$  such that  $\mathcal{I}_{\mathcal{E}} = \mathcal{I}_{\mathcal{E}_{tr}}$ , the learned  $\Phi(X)$  by  $\mathcal{M}_p$  is the maximal invariant predictor of  $\mathcal{I}_{\mathcal{E}}$ . 2. Given the maximal invariant predictor  $\Phi^*$  of  $\mathcal{I}_{\mathcal{E}}$ , assume the pooled training data is made up of data from all environments in  $\text{supp}(\mathcal{E})$ , then the invariance set  $\mathcal{I}_{\mathcal{E}_{tr}}$  regularized by learned environments  $\mathcal{E}_{tr}$  is equal to  $\mathcal{I}_{\mathcal{E}}$ .

*Proof.* For 1, according to theorem B.5, the learned  $\Phi(X)$  by  $\mathcal{M}_p$  is the maximal invariant predictor of  $\mathcal{I}_{\mathcal{E}_{tr}}$ . Therefore, if  $\mathcal{I}_{\mathcal{E}} = \mathcal{I}_{\mathcal{E}_{tr}}$ ,  $\Phi(X)$  is the real maximal invariant predictor.

For 2, assume that  $P_{train}(X, Y) = \sum_{e \in \mathcal{E}} w_e P^e(X, Y)$ , we would like to prove that  $D_{KL}(P_{train}(Y|\Psi^*)||Q)$  reaches minimum when the components in the mixture distribution  $Q$  corresponds to distributions for  $e \in \mathcal{E}$ . Since the learned  $\Phi(X)$  by  $\mathcal{M}_p$  is the maximal invariant predictor of  $\mathcal{I}_{\mathcal{E}}$ , the corresponding  $\Psi(X)$  is exactly the  $\Psi^*(X)$ . Then taking  $Q^* = \sum_{e \in \mathcal{E}} w_e P^e(Y|\Psi^*)$ , we have  $\forall Q \in \mathcal{Q}$ ,

$$D_{KL}(P_{train}(Y|\Psi^*)||Q^*) \leq D_{KL}(P_{train}(Y|\Psi^*)||Q) \quad (33)$$

Therefore, the components in  $Q^*$  correspond to  $P^e$  for  $e \in \mathcal{E}$ , which makes  $\mathcal{I}_{\mathcal{E}_{tr}}$  approaches to  $\mathcal{I}_{\mathcal{E}}$ .  $\square$

## References

- Arjovsky, M., Bottou, L., Gulrajani, I., and Lopez-Paz, D. Invariant risk minimization. *arXiv preprint arXiv:1907.02893*, 2019.
- Koyama, M. and Yamaguchi, S. Out-of-distribution generalization with maximal invariant predictor. *CoRR*, abs/2008.01883, 2020. URL <https://arxiv.org/abs/2008.01883>.
